# Supplementary material
Source: PubMed Central journal article supplement (PMC2728579)

## **Supporting Information**

### **A cellular model to monitor proteasome dysfunction by alpha-synuclein**

**Takashi Nonaka and Masato Hasegawa**

Department of Molecular Neurobiology, Tokyo Institute of Psychiatry, Tokyo Metropolitan Organization for Medical Research, 2-1-8 Kamikitazawa, Setagaya-ku, Tokyo 156-8585.

### **Supplementary figure legends**

**Fig. S1 Biochemical fractionation of cells expressing both of GFP-CL1 and alpha-synuclein.** SH-SY5Y cells were transfected with GFP-CL1 and alpha-synuclein wild-type (WT), A53T or  $\Delta$ 73-83 deletion mutant. Cells were harvested, and cell lysate was fractionated as described in Experimental procedure and analysed by immunoblotting using anti-GFP and anti-Syn102 antibodies. TS, Tris-soluble fraction; TX, Triton X-100-soluble fraction; ppt, SDS-soluble fraction.

Fig. S1 Nonaka et al

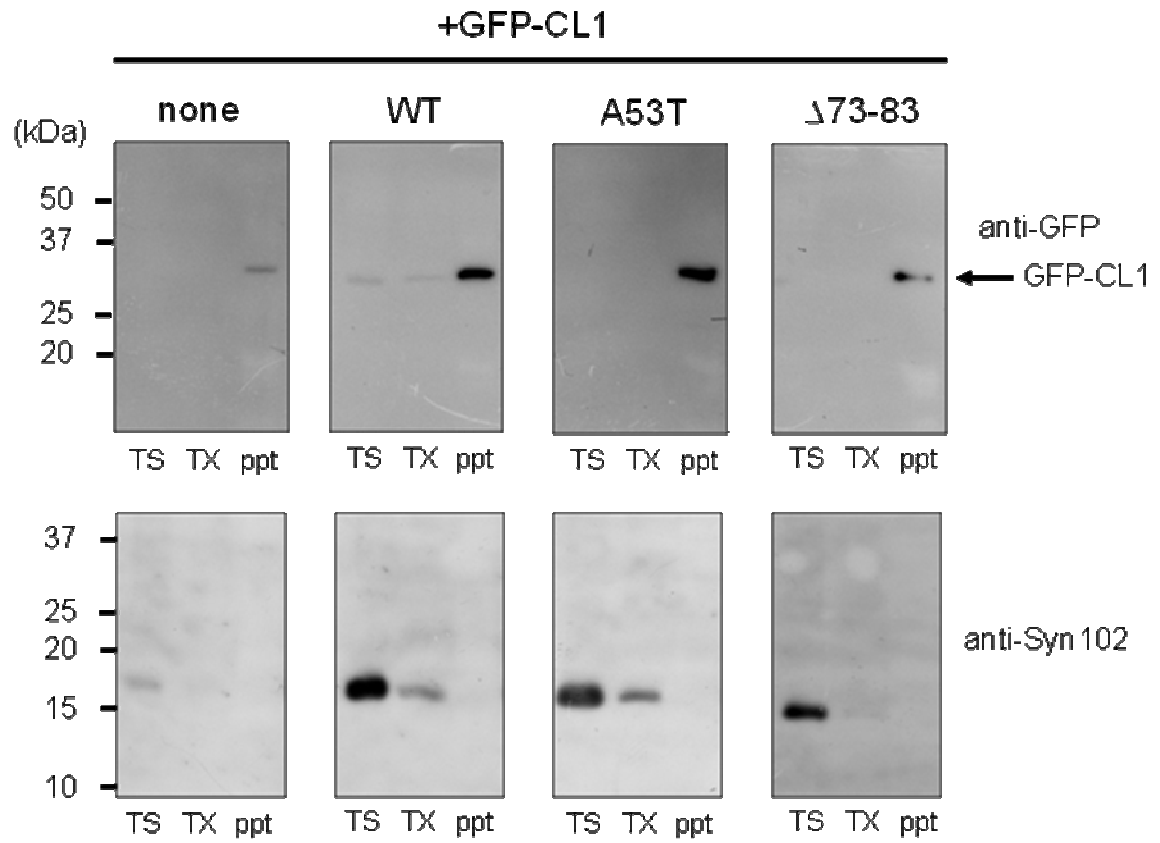

Supplement: bi900619j_si_001.pdf [file bi900619j_si_001.pdf]
